# Supplementary material
Source: PubMed Central journal article supplement (PMC5750847)
Supplement: supp_RA117.000096_4665_2_supp_11206_jxk1z8.pdf [file supp_RA117.000096_4665_2_supp_11206_jxk1z8.pdf]

# **Quantitative Profiling of N-linked Glycosylation Machinery in Yeast *Saccharomyces cerevisiae***

Kristina Poljak<sup>1</sup>, Nathalie Selevsek<sup>2</sup>, Elsy Ngwa<sup>1</sup>, Jonas Grossmann<sup>2</sup>, , Marie Estelle<sup>1</sup>, and Markus

Aebi<sup>1#</sup>

## **Supplementary Information**

**Supplementary Table 1. Yeast strains used in this study.** Related to Experimental Procedures.

| <b>Name</b>         | <b>Genotype</b>                                                                                                                                                                                                        | <b>Source</b> |
|---------------------|------------------------------------------------------------------------------------------------------------------------------------------------------------------------------------------------------------------------|---------------|
| WT                  | <i>MAT<math>\alpha</math> his3<math>\Delta</math>1 leu2<math>\Delta</math>0 lys2<math>\Delta</math>0 ura3<math>\Delta</math>0 <math>\Delta</math>arg4<math>\Delta</math>0</i>                                          | This study    |
| $\Delta$ ost3       | <i>MAT<math>\alpha</math> his3<math>\Delta</math>1 leu2<math>\Delta</math>0 lys2<math>\Delta</math>0 ura3<math>\Delta</math>0 <math>\Delta</math>arg4<math>\Delta</math>0 <math>\Delta</math>ost3::LEU2MX6</i>         | This study    |
| $\Delta$ ost3+pOST6 | <i>MAT<math>\alpha</math> his3<math>\Delta</math>1 leu2<math>\Delta</math>0 lys2<math>\Delta</math>0 ura3<math>\Delta</math>0 <math>\Delta</math>arg4<math>\Delta</math>0 <math>\Delta</math>ost3::LEU2MX6 + pOST3</i> | This study    |
| $\Delta$ ost6       | <i>MAT<math>\alpha</math> his3<math>\Delta</math>1 leu2<math>\Delta</math>0 lys2<math>\Delta</math>0 ura3<math>\Delta</math>0 <math>\Delta</math>arg4<math>\Delta</math>0 <math>\Delta</math>ost6::LEU2MX6</i>         | This study    |
| $\Delta$ ost6+pOST3 | <i>MAT<math>\alpha</math> his3<math>\Delta</math>1 leu2<math>\Delta</math>0 lys2<math>\Delta</math>0 ura3<math>\Delta</math>0 <math>\Delta</math>arg4<math>\Delta</math>0 <math>\Delta</math>ost6::LEU2MX6 + pOST3</i> | This study    |
| $\Delta$ alg9       | <i>MAT<math>\alpha</math> his3<math>\Delta</math>1 leu2<math>\Delta</math>0 lys2<math>\Delta</math>0 ura3<math>\Delta</math>0 <math>\Delta</math>arg4<math>\Delta</math>0 <math>\Delta</math>alg9::NATNT2</i>          | This study    |
| $\Delta$ alg3       | <i>MAT<math>\alpha</math> his3<math>\Delta</math>1 leu2<math>\Delta</math>0 lys2<math>\Delta</math>0 ura3<math>\Delta</math>0 <math>\Delta</math>arg4<math>\Delta</math>0 <math>\Delta</math>alg3::NATNT2</i>          | This study    |

**Supplementary Table 2. Plasmids used in this study.** Related to Experimental Procedures.

| <b>Name</b> | <b>Gene</b> | <b>Source</b>            |
|-------------|-------------|--------------------------|
| pOST3       | <i>OST3</i> | (Schwarz et al., 2005)   |
| pOST6       | <i>OST6</i> | (Knauer and Lehle, 1999) |

**Supplementary Table 3. PRM MS assay for quantitative profiling of N-linked glycosylation machinery in yeast.**

(Available as Excel file)

**Supplementary Table 4. The list of all glycosylation sites identified after ZIC-HILIC enrichment.**

(Available as Excel file)

**Supplementary Table 5. PRM MS assay for quantitative profiling of mevalonate, ergosterol and dolichol pathways.**

(Available as Excel file)

**Supplementary Table 6. Site-specific N-glycosylation occupancy analysis of various OST mutant strains and *Δalg9* strain compared to wild type cells. Data for Figure 2 and 3.**

| UniProt ID | Protein      | Glycosylation Site | <i>Δost3</i>  | <i>Δost3+pOST6</i> | <i>Δost6</i>   | <i>Δost6+pOST3</i> | <i>Δalg9</i>   |
|------------|--------------|--------------------|---------------|--------------------|----------------|--------------------|----------------|
| P00729     | <i>CPY</i>   | N124               | 19.29 ± 3.68  | 29.27 ± 0.04       | 94.29 ± 6.26   | 100.11 ± 5.69      | 33.04 ± 13.09  |
| P00729     | <i>CPY</i>   | N479               | 89.9 ± 11.06  | 94.18 ± 3.23       | 105.43 ± 4.56  | 107.89 ± 0.44      | 21.53 ± 10.06  |
| P12684     | <b>HMG2</b>  | N150               | 3.3 ± 2.05    | 33.37 ± 9.94       | 73.01 ± 8.4    | 75.67 ± 9.36       | 37.76 ± 0.01   |
| P17967     | <b>PDI</b>   | N117               | 13.45 ± 4.35  | 20.06 ± 1.7        | 95.36 ± 1.03   | 99.2 ± 9.31        | 46.8 ± 4.13    |
| P17967     | <b>PDI</b>   | N155               | 72.91 ± 6.02  | 83.64 ± 4.43       | 111.08 ± 6.57  | 95.22 ± 9.47       | 69.62 ± 14.49  |
| P17967     | <b>PDI</b>   | N174               | 76.59 ± 11.17 | 82.93 ± 6.44       | 108.09 ± 6.67  | 97.56 ± 4.56       | 94.09 ± 1.13   |
| P17967     | <b>PDI</b>   | N425               | 5.39 ± 5.68   | 46.64 ± 3.46       | 107.44 ± 3.23  | 90.73 ± 6.88       | 21.81 ± 5.41   |
| P17967     | <b>PDI</b>   | N82                | 67.5 ± 6.95   | 69.86 ± 2.07       | 72.49 ± 4.31   | 107.95 ± 3.31      | 30.51 ± 10.22  |
| P22146     | <i>GAS1</i>  | N40                | 83.44 ± 5.59  | 96.7 ± 3.14        | 84.82 ± 1.79   | 103.73 ± 1.01      | 97.9 ± 7.68    |
| P23797     | <b>GPI12</b> | N110               | 11.51 ± 2.15  | 13.95 ± 0.53       | 104.43 ± 4.92  | 89.25 ± 7.49       | 3.86 ± 2.74    |
| P27810     | <b>KTR1</b>  | N120               | 53.26 ± 4.43  | 53.45 ± 1.16       | 92.77 ± 0.99   | 98.32 ± 3.21       | 93.22 ± 9.81   |
| P27825     | <b>CNE1</b>  | N416               | N/A           | 27.5 ± 2.09        | 85.43 ± 1.25   | 86.67 ± 11.83      | 41.97 ± 14.87  |
| P31382     | <b>PMT2</b>  | N403               | 4.77 ± 4.48   | 11.83 ± 0.38       | 91.64 ± 0.5    | 96.97 ± 9.5        | 65.35 ± 3.45   |
| P32353     | <i>ERG3</i>  | N40                | 48.01 ± 8.81  | 102.21 ± 3.06      | 109.13 ± 5.35  | 95.6 ± 3.31        | 99.64 ± 7.85   |
| P32623     | <i>CRH2</i>  | N233/N237          | 41.08 ± 13.57 | N/A                | 102.13 ± 7.52  | 0 ± 0              | N/A            |
| P32623     | <i>CRH2</i>  | N310               | 50.57 ± 6.28  | 68.22 ± 4.06       | 105.93 ± 2.15  | 90.61 ± 7.87       | 55.3 ± 9.11    |
| P33302     | <i>PDR5</i>  | N734               | 39.71 ± 8.12  | 94.65 ± 4.88       | 87.12 ± 0.24   | 94.74 ± 6.4        | 27.33 ± 10.89  |
| P33754     | <b>SEC66</b> | N12                | 13.17 ± 0.48  | 59.13 ± 3.37       | 101.25 ± 1.68  | 85.88 ± 11.36      | 92.73 ± 8.93   |
| P33767     | <i>WBP1</i>  | N332               | 24.9 ± 6.36   | 61.64 ± 6.42       | 103.42 ± 1.51  | 92.73 ± 1.94       | 65.08 ± 14.79  |
| P33767     | <i>WBP1</i>  | N60                | 4.4 ± 3.94    | 32.54 ± 8.34       | 99.01 ± 0.57   | 90.83 ± 6.28       | 12.84 ± 5.05   |
| P36016     | <b>LHS1</b>  | N458               | 0.38 ± 1.56   | 5.5 ± 4.91         | 84.83 ± 4.39   | 89.18 ± 11.22      | 4.73 ± 3.05    |
| P36051     | <b>MCD4</b>  | N198               | 39.75 ± 16.9  | 85.29 ± 3.57       | N/A            | 47.95 ± 8.33       | N/A            |
| P36051     | <b>MCD4</b>  | N90                | 87.95 ± 9.28  | 106.62 ± 1.66      | 98.43 ± 0.12   | 105.68 ± 4.93      | 100.98 ± 8.24  |
| P36091     | <i>DCW1</i>  | N203               | 87.52 ± 11.14 | 86.9 ± 4.86        | 99.08 ± 3.96   | 86 ± 1.58          | 84.68 ± 11.98  |
| P37302     | <b>APE3</b>  | N150               | 52.91 ± 11.54 | 81.13 ± 4.36       | 84.99 ± 7.04   | 90.64 ± 11.42      | 52.53 ± 8.71   |
| P37302     | <b>APE3</b>  | N162               | 107.35 ± 6.74 | 98.5 ± 10.61       | 103.27 ± 9.71  | 95.19 ± 8.87       | 29.59 ± 10.22  |
| P37302     | <b>APE3</b>  | N85                | 47.72 ± 1.83  | 65.85 ± 6.25       | 109.52 ± 2.65  | 93.52 ± 4.38       | 102.58 ± 11.08 |
| P37302     | <b>APE3</b>  | N96                | 82.18 ± 8.16  | 104.05 ± 2.42      | 59.81 ± 7.83   | 93.82 ± 6.01       | 5.02 ± 4.67    |
| P38244     | <b>PFF1</b>  | N121               | 19.74 ± 5.78  | 73.63 ± 3.1        | 100.54 ± 13.07 | 103.76 ± 7.58      | 16.6 ± 3.61    |
| P38248     | <i>ECM33</i> | N304               | 10.34 ± 7.84  | 63.23 ± 4.48       | 108.15 ± 6.07  | 87.17 ± 1.07       | 55.37 ± 16.56  |
| P38843     | <i>CHS7</i>  | N31                | 34.83 ± 4.32  | 104.88 ± 1.61      | 98.51 ± 1.01   | 99.97 ± 8.25       | 87.25 ± 6.8    |
| P38875     | <i>GPI16</i> | N184               | 6.87 ± 1.76   | 99.3 ± 9.93        | 97.36 ± 6.52   | 104.43 ± 3.53      | 95.52 ± 9.03   |
| P38993     | <b>FET3</b>  | N244               | 8.69 ± 2.29   | 66.67 ± 1.51       | 79.97 ± 7.76   | 103.74 ± 12.75     | 40.52 ± 9.09   |
| P38993     | <b>FET3</b>  | N359               | 64.51 ± 4.08  | 94.36 ± 4.94       | 72.94 ± 12.37  | 100.55 ± 10.6      | 72.7 ± 13.97   |
| P39007     | <b>STT3</b>  | N539               | 66.68 ± 11.55 | 102.21 ± 5.5       | 89.18 ± 7.88   | 103.61 ± 4.28      | 95.22 ± 10.08  |
| P39105     | <i>PLB1</i>  | N215               | 93.52 ± 4.38  | 90.36 ± 5.46       | 78.04 ± 7.36   | 93.1 ± 6.83        | 73.29 ± 6.06   |
| P39105     | <i>PLB1</i>  | N489               | 76.92 ± 2.9   | 101.69 ± 3.65      | 93.94 ± 3.43   | 81.76 ± 1.73       | 92.46 ± 7.03   |
| P40345     | <i>PDAT</i>  | N439               | 103.31 ± 0.13 | 98.13 ± 1.84       | 93.1 ± 6.83    | 88.05 ± 9.77       | N/A            |
| P40533     | <i>TED1</i>  | N266               | 34.18 ± 3.81  | 78.45 ± 1.32       | 87.97 ± 1.07   | 94.34 ± 0.36       | 60.37 ± 6.62   |
| P40557     | <i>EPS1</i>  | N264               | 7.53 ± 3.1    | 108.27 ± 8.03      | 87.91 ± 3.6    | 90.04 ± 8.2        | 85.27 ± 6.25   |
| P40557     | <i>EPS1</i>  | N299               | 40.37 ± 19    | 90.71 ± 9.52       | 75.86 ± 15.22  | 85.34 ± 3.58       | 56.07 ± 0.13   |
| P41543     | <i>OST1</i>  | N217               | 22.19 ± 5.98  | 59.19 ± 0.88       | 98.58 ± 6.44   | 104.58 ± 6.74      | N/A            |
| P43561     | <i>FET5</i>  | N24                | 63.27 ± 16.13 | 78.26 ± 9.3        | 94.58 ± 2.7    | 89.3 ± 0.25        | 25.95 ± 7.39   |
| P43561     | <i>FET5</i>  | N364               | 66.96 ± 0.37  | 97.89 ± 7.22       | 103.5 ± 3.96   | 96.16 ± 6.1        | 88.24 ± 12.25  |
| P43611     | <b>OSW7</b>  | N297               | 0.13 ± 7.23   | 24.45 ± 9.38       | 103.23 ± 1.55  | 99.58 ± 4.67       | 39.4 ± 6.82    |
| P46982     | <i>MNN5</i>  | N136               | 29.66 ± 7     | 93.32 ± 5.1        | 89.4 ± 5.08    | 92.41 ± 10.92      | 21.9 ± 0.98    |
| P46992     | <i>YJR1</i>  | N219               | 50.14 ± 8.37  | 87.88 ± 1.37       | 89.87 ± 7.09   | 95.07 ± 4.66       | 44.3 ± 10.17   |
| P52911     | <i>EXG2</i>  | N157               | 12.88 ± 1.05  | 80.59 ± 10.41      | 102.84 ± 4.52  | 100.04 ± 7.43      | 50.23 ± 12.71  |
| P52911     | <i>EXG2</i>  | N50                | 35.06 ± 6.25  | 106.87 ± 5.12      | 88.11 ± 9.93   | 85.14 ± 5.77       | 78.55 ± 14.79  |
| P53379     | <i>MKC7</i>  | N286               | 28.41 ± 11.05 | 96.74 ± 6.56       | 88.69 ± 13.07  | 96.01 ± 1.36       | 68.19 ± 10.36  |
| P54003     | <i>ROT1</i>  | N47                | 28.16 ± 5.8   | 96.54 ± 3.85       | 88.39 ± 3.1    | 98.93 ± 1.42       | 53.97 ± 4.47   |
| Q03103     | <b>ERO1</b>  | N458               | 58.06 ± 13.22 | 48.29 ± 4.07       | 74.07 ± 9.39   | 94.94 ± 2.27       | 41.26 ± 6.33   |
| Q03281     | <i>HEH2</i>  | N520               | 27.3 ± 12.33  | 101.28 ± 3.38      | 96.09 ± 7.03   | 83.06 ± 10.2       | 8.12 ± 3.54    |
| Q03674     | <i>PLB2</i>  | N193               | 2.11 ± 0.27   | 105.66 ± 4.32      | 76.22 ± 0.19   | 102.12 ± 0.84      | N/A            |
| Q03674     | <i>PLB2</i>  | N217               | 33.69 ± 7.84  | 85.64 ± 9.61       | 102.54 ± 7.69  | 98.66 ± 4.15       | 97.06 ± 6.47   |
| Q03691     | <i>ROT1</i>  | N139               | 75.96 ± 15    | 82.94 ± 1.65       | 106.94 ± 1.91  | 104.16 ± 0.57      | 101.63 ± 4.83  |
| Q06689     | <b>YL413</b> | N429               | 10.52 ± 2.79  | 25.63 ± 14.09      | 105.59 ± 2.77  | 90.98 ± 11.19      | 40.78 ± 13.13  |
| Q06689     | <b>YL413</b> | N49                | 74.13 ± 11.88 | 92.56 ± 3.09       | 112.57 ± 12.49 | 91.95 ± 8.07       | N/A            |
| Q07830     | <b>GPI13</b> | N411               | 22.18 ± 8.07  | 71.24 ± 6.77       | 96.53 ± 14.64  | 94.37 ± 5.33       | 79.6 ± 7.76    |
| Q12465     | <b>RAX2</b>  | N640               | 51.16 ± 0.74  | 92.91 ± 6.76       | 94.94 ± 2.27   | 95.91 ± 10.74      | 32.91 ± 9.91   |
| Q12465     | <b>RAX2</b>  | N677               | 3.73 ± 2.18   | 101.59 ± 1.19      | 106.04 ± 6.39  | 98.63 ± 6.26       | 29.25 ± 7.96   |
| Q12465     | <b>RAX2</b>  | N88                | 1.44 ± 0.24   | 63.72 ± 12.38      | 96.74 ± 6.56   | 94.26 ± 6.12       | N/A            |

Bold and italic - Ost3p substrates. Italic - novel Ost3 substrates.

**Supplementary Table 7. Protein levels of glycoproteins in various OST mutant strains and *Δalg9* strain compared to wild type cells. Data for Figure 5B.**

| UniProt ID | Protein | <i>Δost3</i>   | <i>Δost3+pOST6</i> | <i>Δost6</i>   | <i>Δost6+pOST3</i> | <i>Δalg9</i>   |
|------------|---------|----------------|--------------------|----------------|--------------------|----------------|
| P00729     | CPY     | 123.44 ± 7.14  | 93.91 ± 1.76       | 85.59 ± 8.94   | 109.36 ± 14.09     | 95.59 ± 10.99  |
| P12684     | HMG2    | 120.25 ± 1.71  | 88.6 ± 8.98        | 124.2 ± 18.72  | 158.37 ± 17.55     | 141.5 ± 16.93  |
| P17967     | PDI     | 182.48 ± 26.59 | 121.57 ± 9.45      | 91.2 ± 7.34    | 118.45 ± 9.76      | 164.86 ± 5.39  |
| P22146     | GAS1    | 55.04 ± 7.93   | 80.67 ± 1.8        | 93.4 ± 12.41   | 85.6 ± 2.67        | 114.75 ± 3.58  |
| P23797     | GPI12   | 84.9 ± 1.88    | 99.18 ± 7.71       | 85.39 ± 10     | 99.01 ± 7.47       | 99.27 ± 5.53   |
| P27810     | KTR1    | 130.97 ± 5.58  | 99.22 ± 0.5        | 119.8 ± 6      | 90.17 ± 5.43       | 110.93 ± 12.84 |
| P27825     | CNE1    | N/A            | 217.01 ± 12.78     | 68.77 ± 0.45   | 111.94 ± 21.65     | 125.67 ± 15.71 |
| P31382     | PMT2    | 128.04 ± 9.51  | 106.33 ± 2.18      | 96.38 ± 5.46   | 99.32 ± 5.15       | 143.82 ± 10.64 |
| P32353     | ERG3    | 104.47 ± 9.87  | 110.61 ± 9.13      | 85.79 ± 4.45   | 105.3 ± 19.91      | 498.58 ± 67.42 |
| P32623     | CRH2    | 79.04 ± 1.08   | 96.3 ± 2.81        | 90.48 ± 6.3    | 123.64 ± 13.24     | 143.27 ± 14.61 |
| P33302     | PDR5    | 70.8 ± 4.22    | 92.75 ± 4.94       | 51.16 ± 3.76   | 92.6 ± 7.63        | 67.92 ± 6.8    |
| P33754     | SEC66   | 114.55 ± 4.35  | 102.87 ± 0.56      | 92.7 ± 8.84    | 94.46 ± 3.79       | 123.3 ± 18.98  |
| P33767     | WBP1    | 106.87 ± 7.81  | 105.13 ± 5.96      | 99.99 ± 8.85   | 98.57 ± 5.1        | 108.65 ± 5.29  |
| P36016     | LHS1    | 193.98 ± 16.49 | 121.16 ± 7.75      | 161.95 ± 39.58 | 122.5 ± 9.18       | 140.02 ± 7.5   |
| P36051     | MCD4    | 172.67 ± 1.55  | 88.52 ± 6.38       | 97.81 ± 0.36   | 105.07 ± 1.26      | 129.16 ± 4.98  |
| P36091     | DCW1    | 108.61 ± 26.26 | 89 ± 0.56          | 109.7 ± 4.2    | 91.73 ± 9.65       | 173.78 ± 17.35 |
| P37302     | APE3    | 88.38 ± 18.93  | 97.32 ± 14.92      | 83.88 ± 6.31   | 103.98 ± 6.31      | 86.58 ± 13.3   |
| P38244     | PFF1    | 65.06 ± 13.84  | 95.42 ± 11.24      | 97.27 ± 8.36   | 84.28 ± 6.19       | 105.28 ± 12.64 |
| P38248     | ECM33   | 66.16 ± 13.1   | 80.4 ± 3.99        | 70.91 ± 3.59   | 93.68 ± 8.47       | 131.78 ± 8.31  |
| P38843     | CHS7    | 95.76 ± 2.17   | 121.37 ± 9.43      | 91.85 ± 5.2    | 117.97 ± 8.35      | 170.38 ± 18.28 |
| P38875     | GPI16   | 105.61 ± 4.13  | 107.53 ± 2.55      | N/A            | 104.17 ± 7.08      | 99.25 ± 16.36  |
| P38993     | FET3    | 70.65 ± 4.64   | 76.43 ± 8.74       | 61.09 ± 8.11   | 76.5 ± 6.24        | 111.72 ± 14.39 |
| P39007     | STT3    | 96.63 ± 8.97   | 99.91 ± 2.23       | 98.51 ± 6.21   | 97.44 ± 4.81       | 109.56 ± 18.32 |
| P39105     | PLB1    | 66.03 ± 8.86   | 55.34 ± 0.34       | 85.22 ± 5.29   | 122.38 ± 11.25     | 100.69 ± 8.04  |
| P40345     | PDAT    | 82.04 ± 5.24   | 94.83 ± 7.31       | N/A            | 80.26 ± 4.47       | 96.34 ± 11.97  |
| P40533     | TED1    | 100.29 ± 15.62 | 90.77 ± 7.12       | 87.23 ± 7.12   | 91.79 ± 10.22      | 99.41 ± 5.26   |
| P40557     | EPS1    | 152.92 ± 26.91 | 87.06 ± 1.17       | 100.04 ± 11.86 | 89.92 ± 12.69      | 171.64 ± 17.28 |
| P41543     | OST1    | 109.59 ± 7.89  | 107.89 ± 3.71      | 103.7 ± 3.12   | 109.41 ± 5.65      | 98.51 ± 7.57   |
| P43561     | FET5    | 51.68 ± 16.13  | 85.01 ± 5.37       | 75.45 ± 0.91   | 102.93 ± 9.23      | 95.38 ± 14.97  |
| P43611     | OSW7    | 107.6 ± 15.79  | 82.79 ± 5.7        | 76.03 ± 0.41   | 65.74 ± 16.86      | 117.24 ± 8.98  |
| P46982     | MNN5    | 79.93 ± 6.04   | 84.56 ± 0.83       | 108.41 ± 16.77 | 90.21 ± 6.67       | 172.91 ± 26.82 |
| P46992     | YJR1    | 116.54 ± 8.14  | 105.36 ± 0.8       | 91.81 ± 4.08   | 113.65 ± 4.19      | 92.74 ± 8.75   |
| P52911     | EXG2    | 95.66 ± 10.65  | 85.09 ± 6.27       | 96.63 ± 6.16   | 104.43 ± 4.38      | 103.77 ± 11.87 |
| P53379     | MKC7    | 70.21 ± 5.56   | 92.72 ± 1.76       | 90.13 ± 7.89   | 93.14 ± 9.59       | 127.83 ± 7.15  |
| P54003     | SUR7    | 95.44 ± 3.04   | 87.64 ± 5.8        | 87.62 ± 8.67   | 84.71 ± 4.01       | 114.09 ± 18.67 |
| Q03103     | ERO1    | 216.12 ± 23.43 | 127.29 ± 2.12      | 104.01 ± 7.87  | 117.14 ± 4.44      | 169.75 ± 10.81 |
| Q03281     | HEH2    | 119.35 ± 3.68  | 95.9 ± 9.41        | 85.36 ± 8.13   | 86.45 ± 0.05       | 124.06 ± 13.24 |
| Q03674     | PLB2    | 59.09 ± 12.06  | 77.46 ± 6.42       | 94.82 ± 8.56   | 128.16 ± 12.06     | 108.76 ± 5.22  |
| Q03691     | ROT1    | 208.75 ± 54.58 | 102.99 ± 10.04     | 108.83 ± 3.22  | 120.52 ± 0.18      | 253.45 ± 28.11 |
| Q06689     | YL413   | 60 ± 6.16      | 101.91 ± 2.62      | 80.25 ± 5.64   | 94.06 ± 10.68      | 89.49 ± 9.57   |
| Q07830     | GPI13   | 140.93 ± 21.19 | 93.74 ± 3.4        | 102.16 ± 6.34  | 98.09 ± 4.3        | 109.92 ± 7.42  |
| Q12465     | RAX2    | 90.71 ± 6.22   | 91.81 ± 8.65       | 81.17 ± 3.25   | 94.58 ± 10.37      | 161.21 ± 9.23  |

**Supplementary Table 8. Protein levels of different mevalonate, ergosterol and dolichol pathway proteins in strains deleted of *ALG3* or *ALG9* gene, or treated with sterol inhibitor miconazole. Data for Figure 5C.**

| UniProt ID | Protein | $\Delta alg3$  | $\Delta alg9$  | miconazole     |
|------------|---------|----------------|----------------|----------------|
| P41338     | ERG10   | 96.38 ± 7.34   | 89.06 ± 4.96   | 180.77 ± 0.75  |
| P12683     | HMG1    | 169.9 ± 1.34   | 177.27 ± 5.73  | N/A            |
| P12684     | HMG2    | 160.84 ± 2.05  | 167.73 ± 2.38  | 86.34 ± 9.44   |
| P07277     | ERG12   | 114.77 ± 4.36  | 158.25 ± 0.63  | 144.2 ± 3.99   |
| P32377     | ERG19   | 90.48 ± 1.87   | 106.74 ± 11.52 | 144.51 ± 12.79 |
| P08524     | ERG20   | 124.35 ± 2.06  | 111.88 ± 10.25 | 125.67 ± 4.87  |
| P29704     | ERG9    | 100.18 ± 9.74  | 97.34 ± 3.22   | 157.37 ± 8.93  |
| P32476     | ERG1    | 259.71 ± 47.38 | 140.98 ± 5.53  | 102 ± 35.18    |
| P38604     | ERG7    | 131.31 ± 12.47 | 100.18 ± 2.36  | 147.58 ± 0.03  |
| P10614     | ERG11   | 482.55 ± 62.26 | 383.42 ± 23.58 | 571.84 ± 17.43 |
| P53045     | ERG25   | 471.15 ± 94.77 | 399.78 ± 10.2  | 404.82 ± 49.68 |
| P53199     | ERG26   | 97.68 ± 5.76   | 94.57 ± 6.31   | 175.91 ± 6.89  |
| Q12452     | ERG27   | 106.5 ± 10.12  | 103.92 ± 5.58  | 188.25 ± 4.68  |
| P25087     | ERG6    | 98.46 ± 11.23  | 95.85 ± 2.43   | 190.6 ± 5.05   |
| P32352     | ERG2    | 105.56 ± 14.6  | 110.93 ± 14.97 | 211.25 ± 5.04  |
| P32353     | ERG3    | 422.12 ± 41.84 | 434.27 ± 30.95 | 502.72 ± 21.75 |
| P54781     | ERG5    | 301.25 ± 43.12 | 232.19 ± 15.94 | 420.38 ± 52.99 |
| P25340     | ERG4    | 94.81 ± 9.23   | 94.53 ± 5.75   | 180.77 ± 0.75  |
| P35196     | RER2    | 100.92 ± 11.4  | 100.32 ± 6.39  | 92.23 ± 3.85   |
| Q12063     | NUS1    | 151.58 ± 23.59 | 142.06 ± 0.21  | 127.52 ± 5.66  |

## References to Supplementary Information

- Knauer, R., and L. Lehle. 1999. The oligosaccharyltransferase complex from *Saccharomyces cerevisiae*. Isolation of the OST6 gene, its synthetic interaction with OST3, and analysis of the native complex. *The Journal of biological chemistry*. 274:17249-17256.
- Schwarz, M., R. Knauer, and L. Lehle. 2005. Yeast oligosaccharyltransferase consists of two functionally distinct sub-complexes, specified by either the Ost3p or Ost6p subunit. *Febs Lett*. 579:6564-6568.
